# Supplementary material for: Effect of shear forces and ageing on the compliance of adhesive pads in adult cockroaches
Source: Oxford University Press journal article supplement (doi:10.1242/jeb.124362), 2015-01-01
Supplement: jeb124362supp.pdf [file jeb124362supp.pdf]

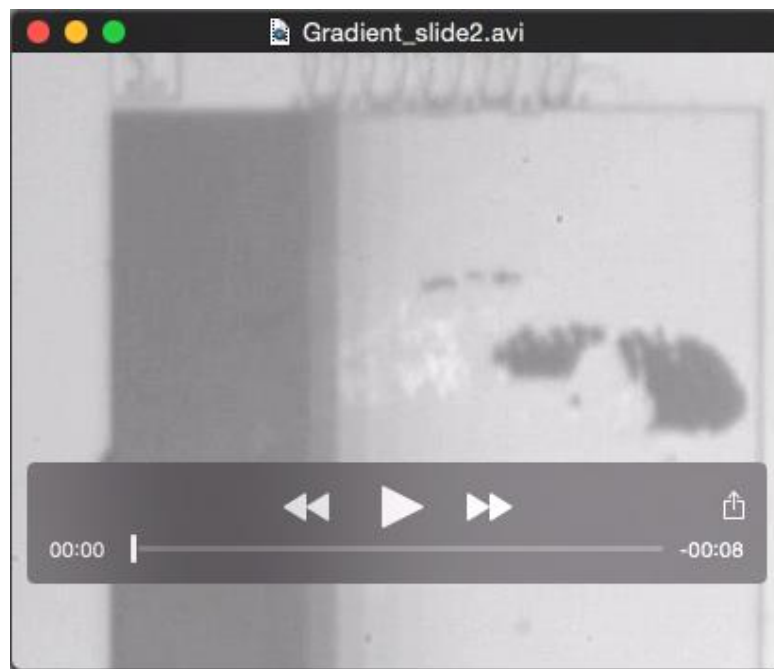

Movie 1. Adhesive pad of cockroach (*Nauphoeta cinerea*) sliding across gradient micro-pillar substrate. The pillar spacing increases from 3  $\mu\text{m}$  (left) to 8  $\mu\text{m}$  (right) in steps of 0.5  $\mu\text{m}$ . See Fig. 2 and 3.
